# Supplementary material
Source: PubMed Central journal article supplement (PMC8283687)

Extended Data Fig. 1d

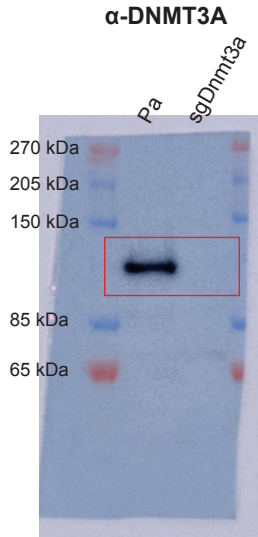

↓  
Stripped  
and re-probed:

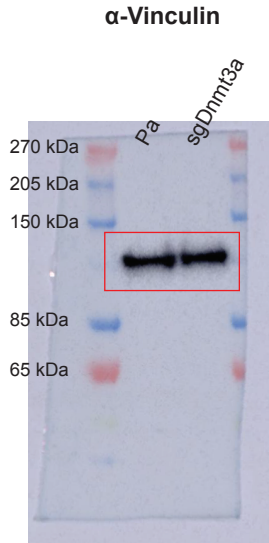

Supplement: NIHMS1719075-supplement-Source_Data_Ext_Fig_1.pdf [file NIHMS1719075-supplement-Source_Data_Ext_Fig_1.pdf]

# Extended Data Fig. 5a

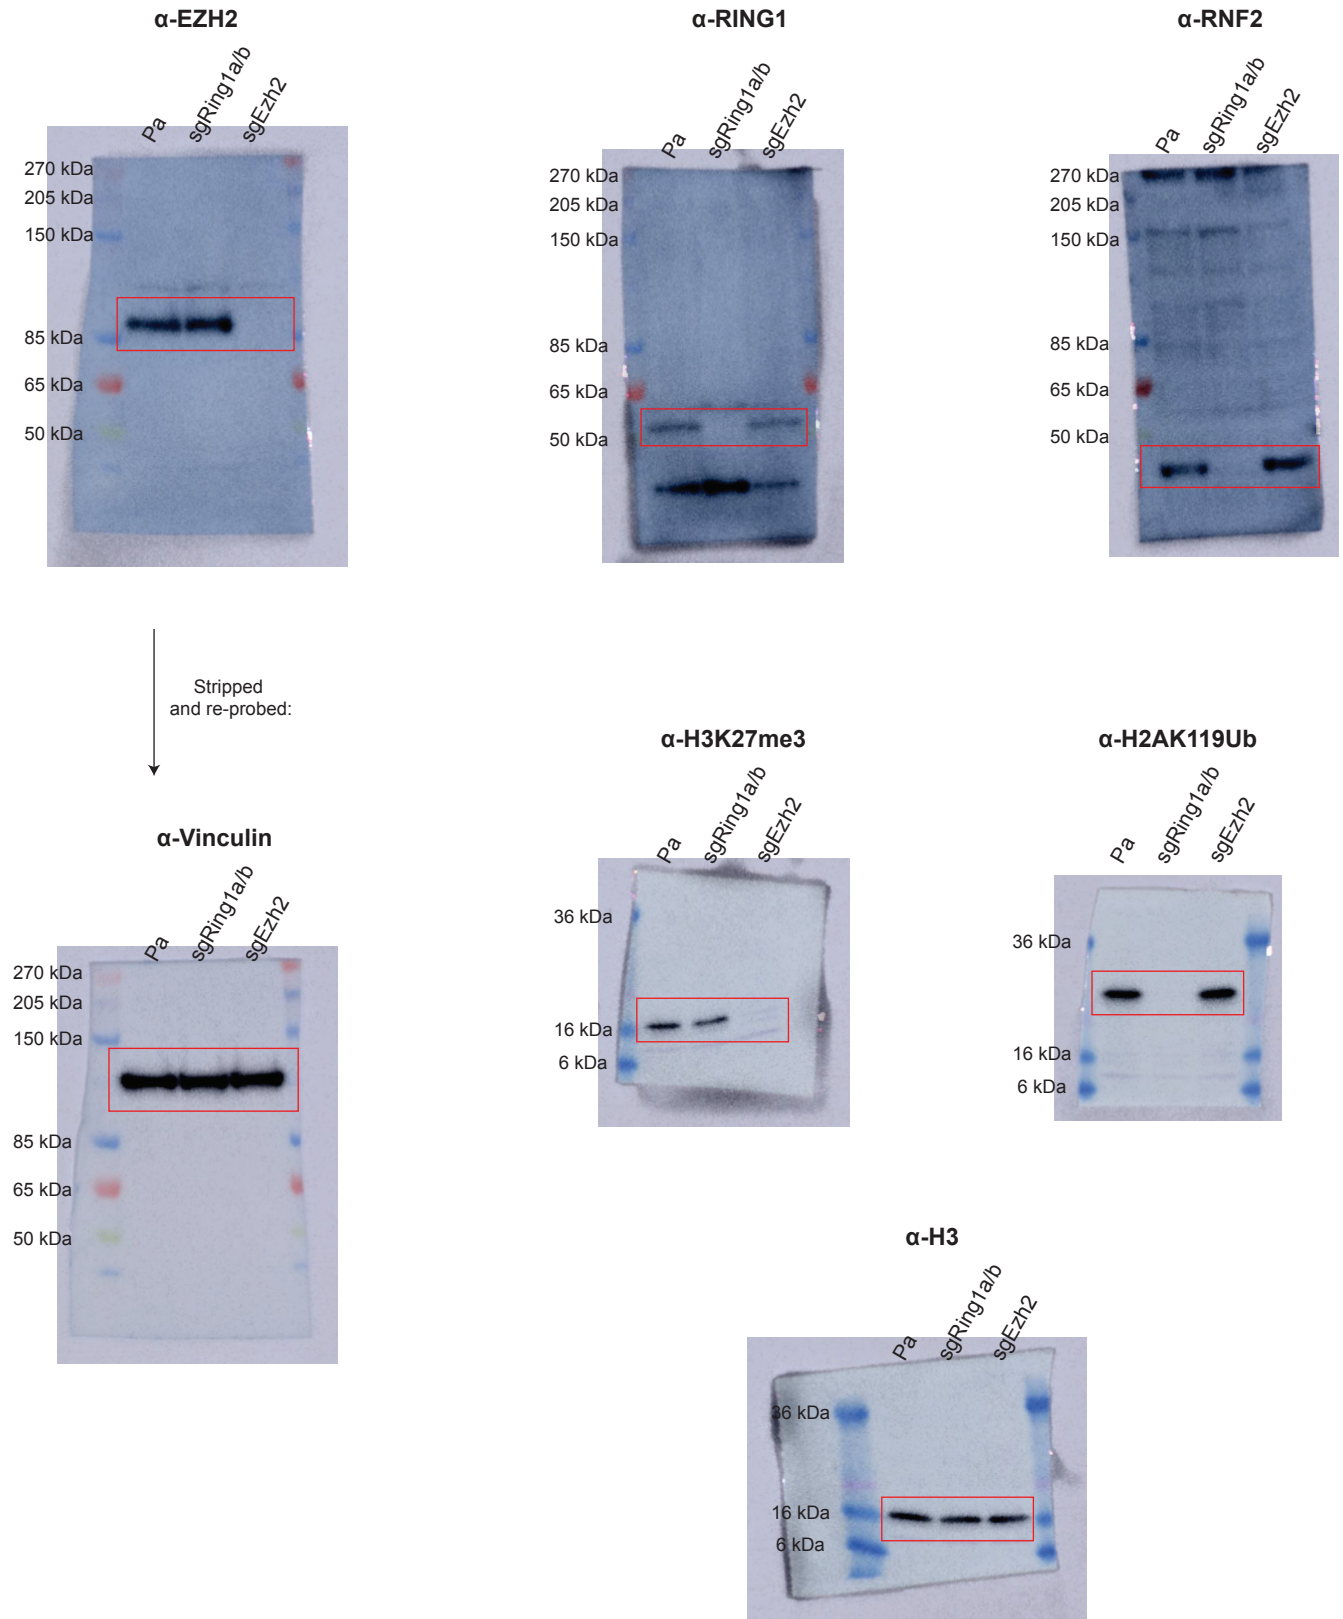

Supplement: NIHMS1719075-supplement-Source_Data_Ext_Fig_5__gels_.pdf [file NIHMS1719075-supplement-Source_Data_Ext_Fig_5__gels_.pdf]

# Extended Data Fig. 6a

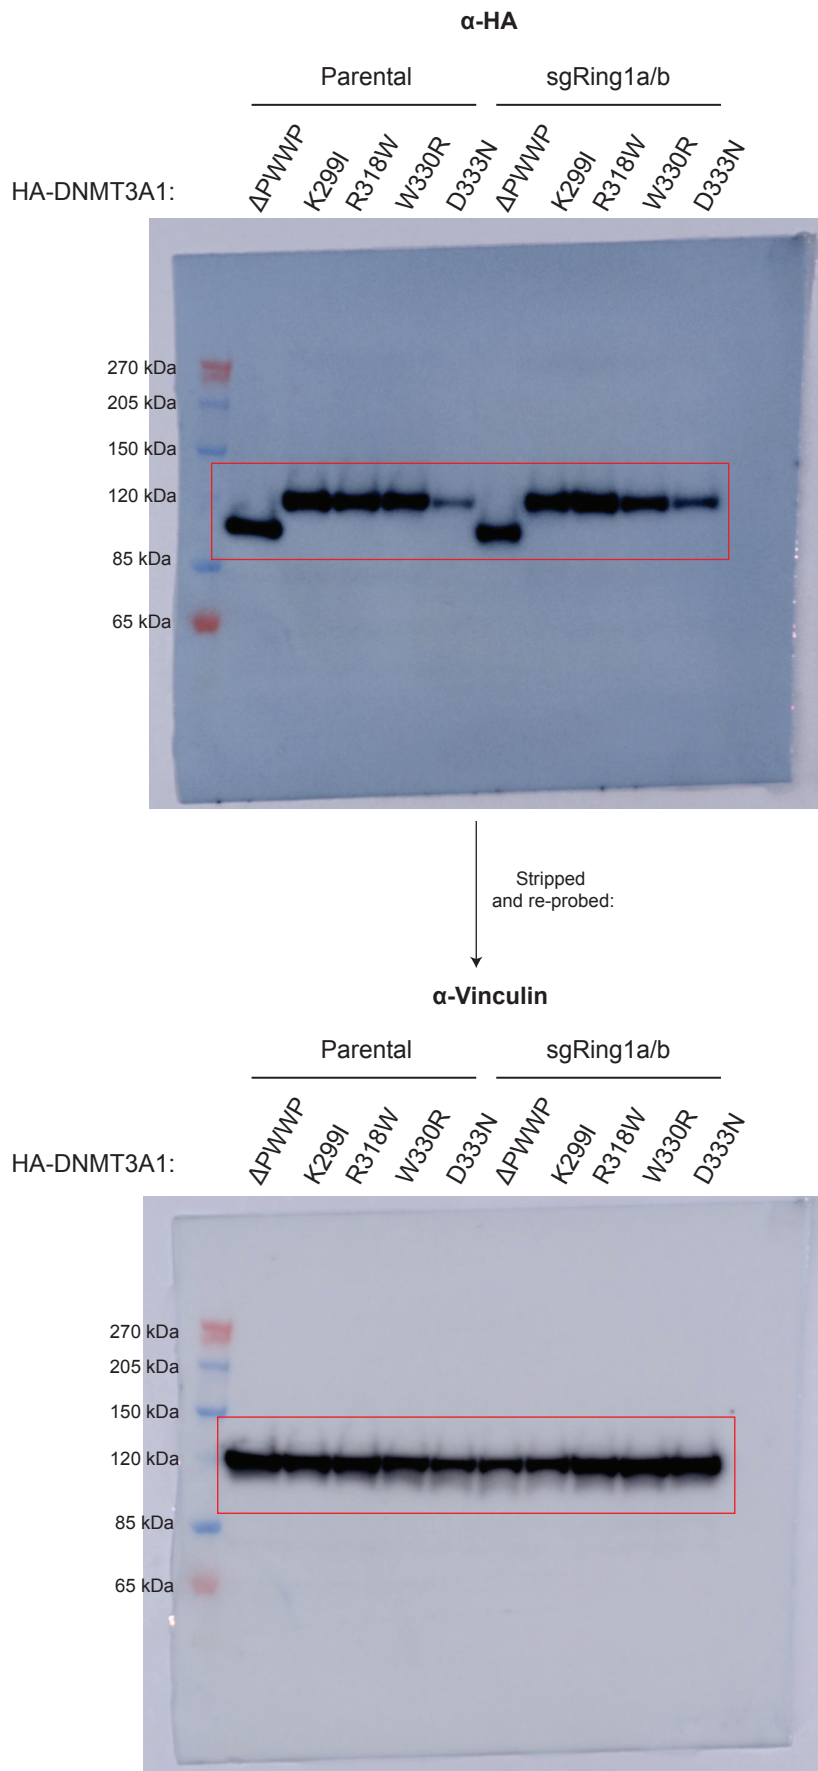

Supplement: NIHMS1719075-supplement-Source_Data_Ext_Fig_6.pdf [file NIHMS1719075-supplement-Source_Data_Ext_Fig_6.pdf]

Extended Data Fig. 7a

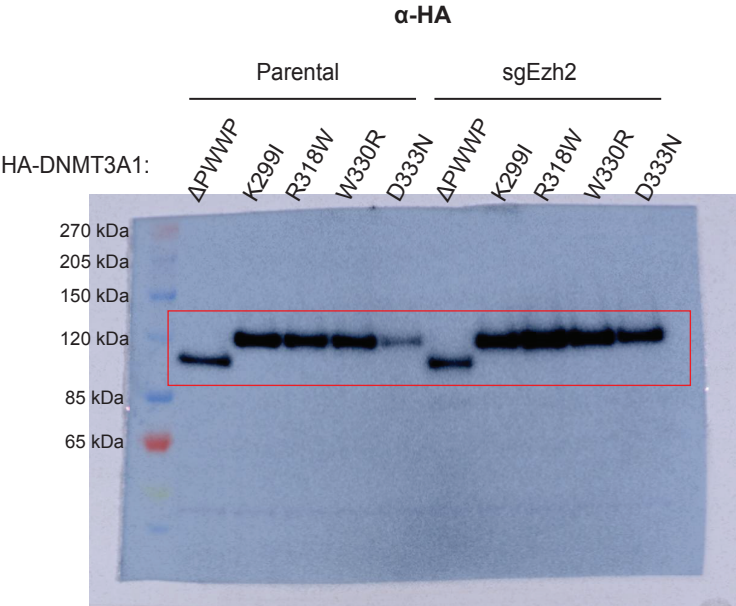

↓  
Stripped  
and re-probed:

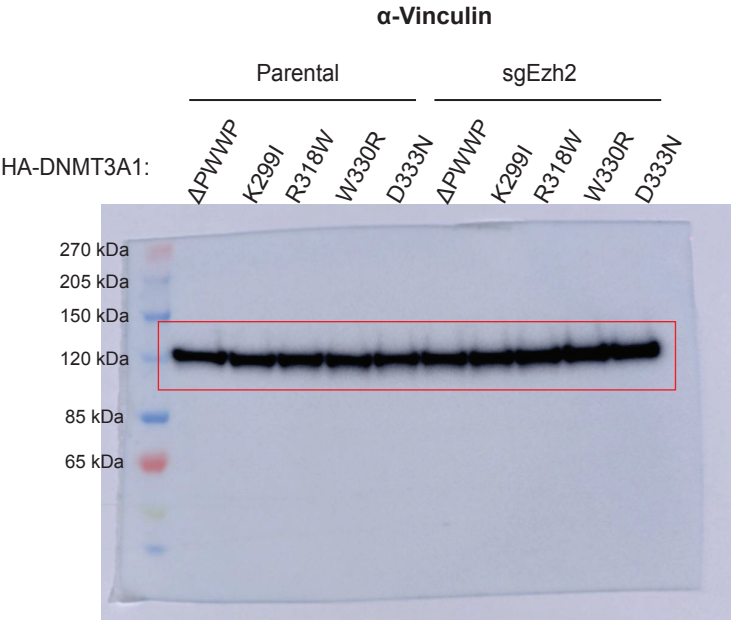

Supplement: NIHMS1719075-supplement-Source_Data_Ext_Fig_7.pdf [file NIHMS1719075-supplement-Source_Data_Ext_Fig_7.pdf]

# Extended Data Fig. 8c

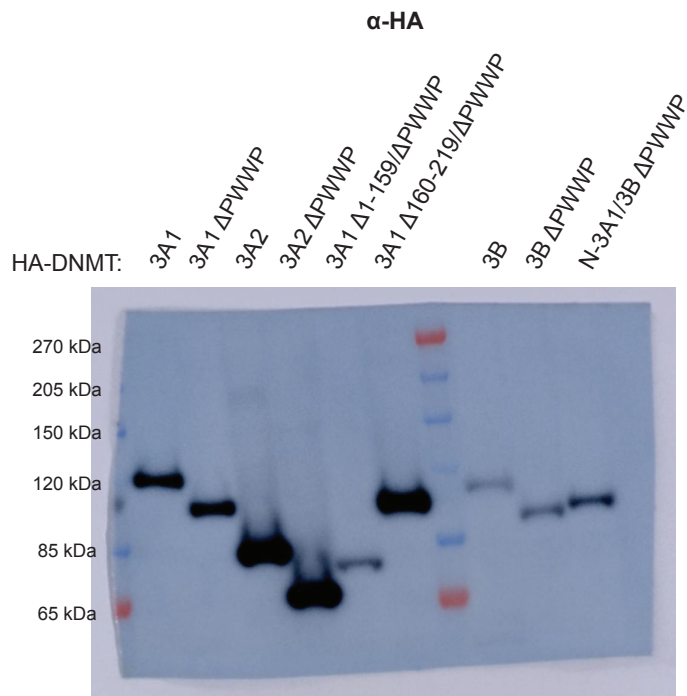

↓  
Stripped  
and re-probed:

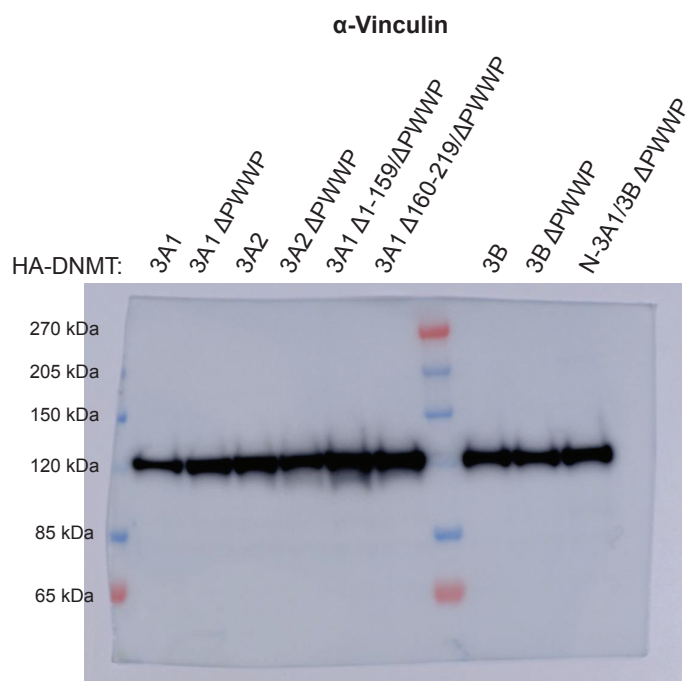

Supplement: NIHMS1719075-supplement-Source_Data_Ext_Fig_8__gels_.pdf [file NIHMS1719075-supplement-Source_Data_Ext_Fig_8__gels_.pdf]
